# Supplementary material for: Lactobacillus Reuteri DSM 17938 (Limosilactobacillus reuteri) in Diarrhea and Constipation: Two Sides of the Same Coin?
Source: MDPI journal article supplement (doi:10.3390/medicina57070643), 2021-06-23
Supplement: s1 [file s1]

**Table S1. Summary of studies on the role of *L. reuteri* in constipation and diarrhea.**

| Study                     | Patients                                                                                                                                 | Probiotic<br>( <i>L. reuteri</i> DSM<br>17938)                                                     | Duration | Results in <i>constipation</i>                                                                                                                                                                                                      |
|---------------------------|------------------------------------------------------------------------------------------------------------------------------------------|----------------------------------------------------------------------------------------------------|----------|-------------------------------------------------------------------------------------------------------------------------------------------------------------------------------------------------------------------------------------|
| Coccorullo<br>et al [38]  | 44 infants (5–10<br>months old)<br>22 probiotics vs 22<br>placebo                                                                        | 1x 10 <sup>8</sup> CFU/day<br>drops of oily<br>suspension                                          | 8 weeks  | No therapeutic success in constipation<br>Higher frequency of bowel movements in<br>probiotic group at 2-4-8 weeks. No<br>difference in stool consistency                                                                           |
| Ojetti et al [3]          | 20 adults (mean age<br>36.2 ± 13.7)                                                                                                      | 10 <sup>8</sup> CFU in 1<br>capsule                                                                | 4 weeks  | Beneficial effect on chronic constipation,<br>via a significant decrease of CH <sup>4</sup><br>production.                                                                                                                          |
| Riezzo et al [42]         | 56 patients                                                                                                                              | 4×10 <sup>8</sup> CFU (28<br>patients) vs 2×10 <sup>8</sup><br>CFU (28 patients)                   | 105 days | Useful in association therapy rather than as<br>single-drug therapy in the management of<br>constipation.                                                                                                                           |
| Indrio et al [39]         | 468<br>infants (first 3<br>months of life)<br>238 in probiotics<br>groups vs 230<br>placebo                                              | 1 × 10 <sup>8</sup> CFU/day<br>drops of oily<br>suspension                                         | 90 days  | Improves constipation during the first 3<br>months of life.                                                                                                                                                                         |
| Kubota et al [2]          | 60 (>6 months- <6<br>years old)<br>20 probiotics +<br>placebo of MgO vs<br>19 probiotics + MgO<br>vs 21 placebo of<br>probiotics and MgO | 10 <sup>8</sup> CFU in 5 drops<br>of a commercially<br>available oil<br>suspension, twice a<br>day | 4 weeks  | <i>L. reuteri</i> DSM 17938 was effective in<br>functional constipation in young children.<br>MgO caused an imbalance in the<br>gastrointestinal microbiome, which was<br>not reported in the group treated with this<br>probiotic. |
| Ojetti et al [37]         | 40 adults (18M/22F,<br>35+/-15 years)<br>20 probiotics vs 20<br>placebo                                                                  | 10 <sup>8</sup><br>CFU in tablets twice<br>per day                                                 | 4 weeks  | Effective in improving bowel movement<br>frequency in adult patients with functional<br>constipation but no effect on stool<br>consistency.                                                                                         |
| Study                     | Patients                                                                                                                                 | Probiotic<br>( <i>L. reuteri</i> )                                                                 | Duration | Results in <i>diarrhea</i>                                                                                                                                                                                                          |
| Francavilla<br>et al [18] | 69 infants (6-36<br>months old)<br>35 probiotics vs 34<br>placebo                                                                        | 4 x 10 <sup>8</sup> CFU/day<br>drops of oily<br>suspension                                         | 7 days   | <i>L. reuteri</i> plus rehydration therapy was<br>effective in acute diarrhea reducing the<br>frequency, duration and recurrence rate of<br>the disease.                                                                            |

|                        |                                                                                 |                                                                                                                      |          |                                                                                                                                  |
|------------------------|---------------------------------------------------------------------------------|----------------------------------------------------------------------------------------------------------------------|----------|----------------------------------------------------------------------------------------------------------------------------------|
| Shornikova et al [24]  | 86 children (6-36 months) positive for rotavirus<br>43 probiotics vs 43 placebo | either $10^{10}$ or $10^7$ CFU/daily                                                                                 | 5 days   | It shortens the duration of acute watery diarrhea with a dose-related effect.                                                    |
| Dinleyici et al [25]   | 64 children (32 probiotics + oral rehydration vs 32 oral rehydration)           | $1 \times 10^8$ CFU/day + oral rehydration solution                                                                  | 5 days   | It reduces the duration of acute diarrhea in hospitalized children.                                                              |
| Urbańska et al [26]    | review including 1229 infants and children up to 18 years of age                | $1 \times 10^8$ to $4 \times 10^8$ CFU/day                                                                           | 5-7 days | The use of this probiotic may be considered in the management of acute gastroenteritis as an adjunct to rehydration.             |
| Szymański et al [27]   | 99 children (< 5 years old)                                                     | $2 \times 10^8$ CFU                                                                                                  | 5 days   | It, in addition to standard rehydration therapy, reduces the duration of hospitalization but not the duration of diarrhea.       |
| Patro-Golab et al [29] | review of 347 participants (172 probiotic group and 175 controls)               | daily doses ranged from $1 \times 10^8$ CFU (5 days) to $2 \times 10^8$ CFU (5 days) to $4 \times 10^8$ CFU (7 days) | 5-7 days | Useful and safe for the treatment and prevention of diarrhea, reducing both the diarrhea duration and the intensity of symptoms. |
